# Supplementary material for: Single-side functionalized graphene as promising cathode catalysts in nonaqueous lithium–oxygen batteries
Source: Royal Society of Chemistry journal article supplement (doi:10.1039/d1nr03893a), 2021-01-01
Supplement: d1nr03893a1.pdf [file d1nr03893a1.pdf]

*Electronic supplementary information (ESI)*

**Single-Side Functionalized Graphene as Promising Cathode Catalysts in  
Nonaqueous Lithium-Oxygen Batteries**

Huilong Dong,<sup>1,\*</sup> Cai Ning,<sup>3</sup> Gang Yang,<sup>1,4</sup> Hongmei Ji,<sup>1,4</sup> and Youyong Li<sup>2,5\*</sup>

1. School of Materials Engineering, Changshu Institute of Technology, Changshu, Jiangsu 215500, China
2. Institute of Functional Nano & Soft Materials (FUNSOM), Soochow University, Suzhou, Jiangsu 215123, China
3. School of Physics, Southeast University, Nanjing 211189, China
4. Suzhou Key Laboratory of Functional Ceramic Materials, Changshu Institute of Technology, Changshu 215500, China
5. Macao Institute of Materials Science and Engineering, Macau University of Science and Technology, Taipa 999078, Macau SAR, China

\* Corresponding authors

E-mail: huilong\_dong@126.com (H. Dong); yyli@suda.edu.cn (Y. Li).

### Additional computational details and analysis on stability

The phonon calculations were carried out by using the finite displacement method as implemented in the PHONOPY code.<sup>1</sup> As shown in **Fig. S1**, there is no imaginary frequency found in all the calculated phonon dispersion spectra of the  $C_nX$ . Therefore, we confirmed that the  $C_nX$  are dynamically stable structures. First-principles molecular dynamics (FPMD) simulations were carried out by DMol<sup>3</sup>. Each MD simulation in the constant-volume and constant-temperature (NVT) ensemble lasted for 5 ps with a time step of 1 fs, and the temperature oscillations were controlled using the algorithm of massive generalized Gaussian moments. The temperature was set as 300 K to assess the thermal stability of the studied  $C_nX$  under room temperature. As we can see in **Fig. S2**, the structures and bonding of  $C_nX$  are merely changed after 5 ps MD under 300 K. Thus the  $C_nX$  could keep stable under room temperature, which is enough for their applications in nonaqueous Li-O<sub>2</sub> battery.

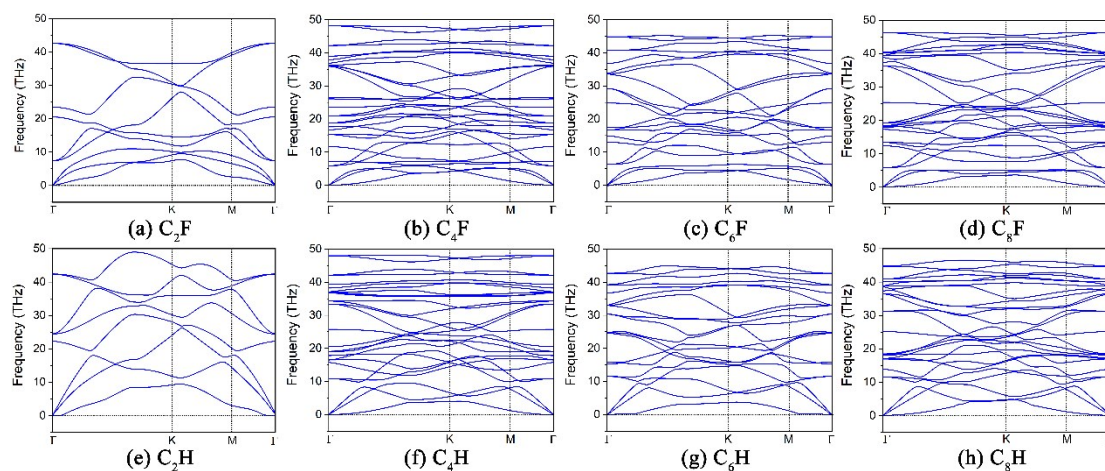

**Fig. S1** Calculated phonon dispersion spectra of the  $C_nX$ .

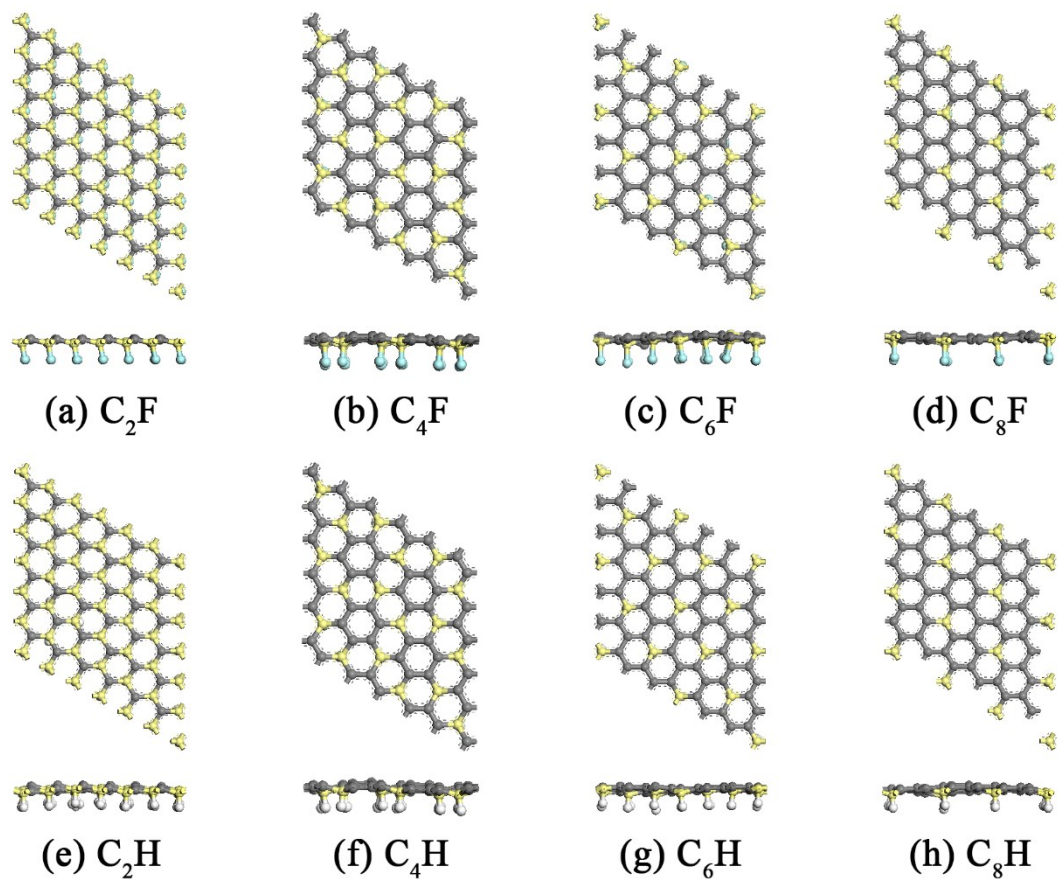

**Fig. S2** Top views and side views of geometric structures of  $C_nX$  after 5 ps FPMD simulation at 300K. The grey, yellow, blue and white spheres denote  $sp^2$ -C,  $sp^3$ -C, F and H atoms, respectively.

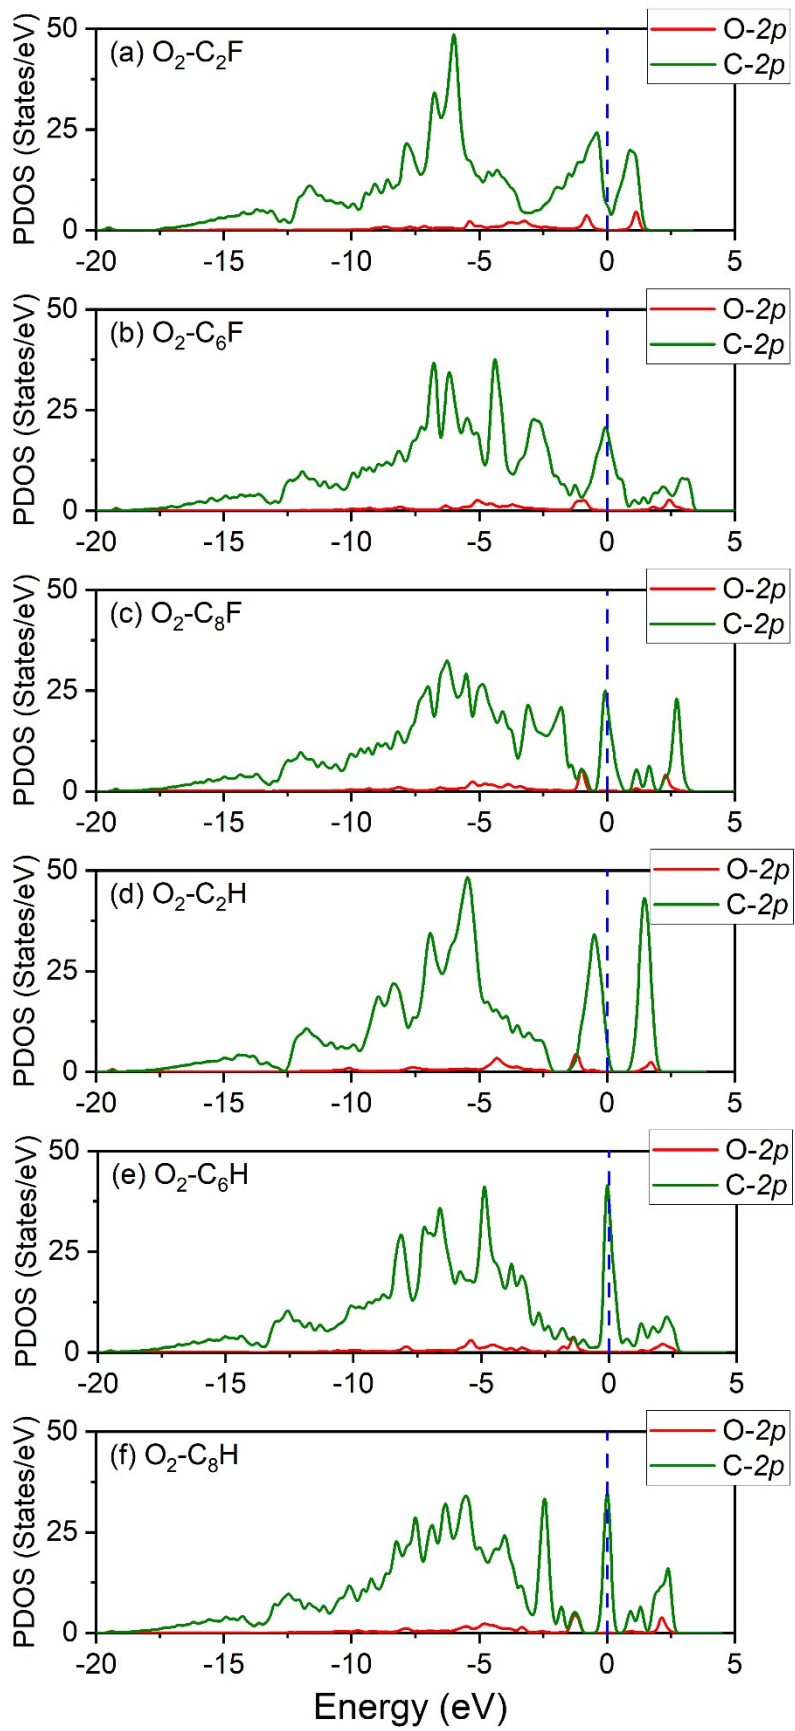

**Fig. S3** Analysis on partial density of states (PDOS) of  $O_2$  adsorbed SSX-Gr<sub>s</sub>.

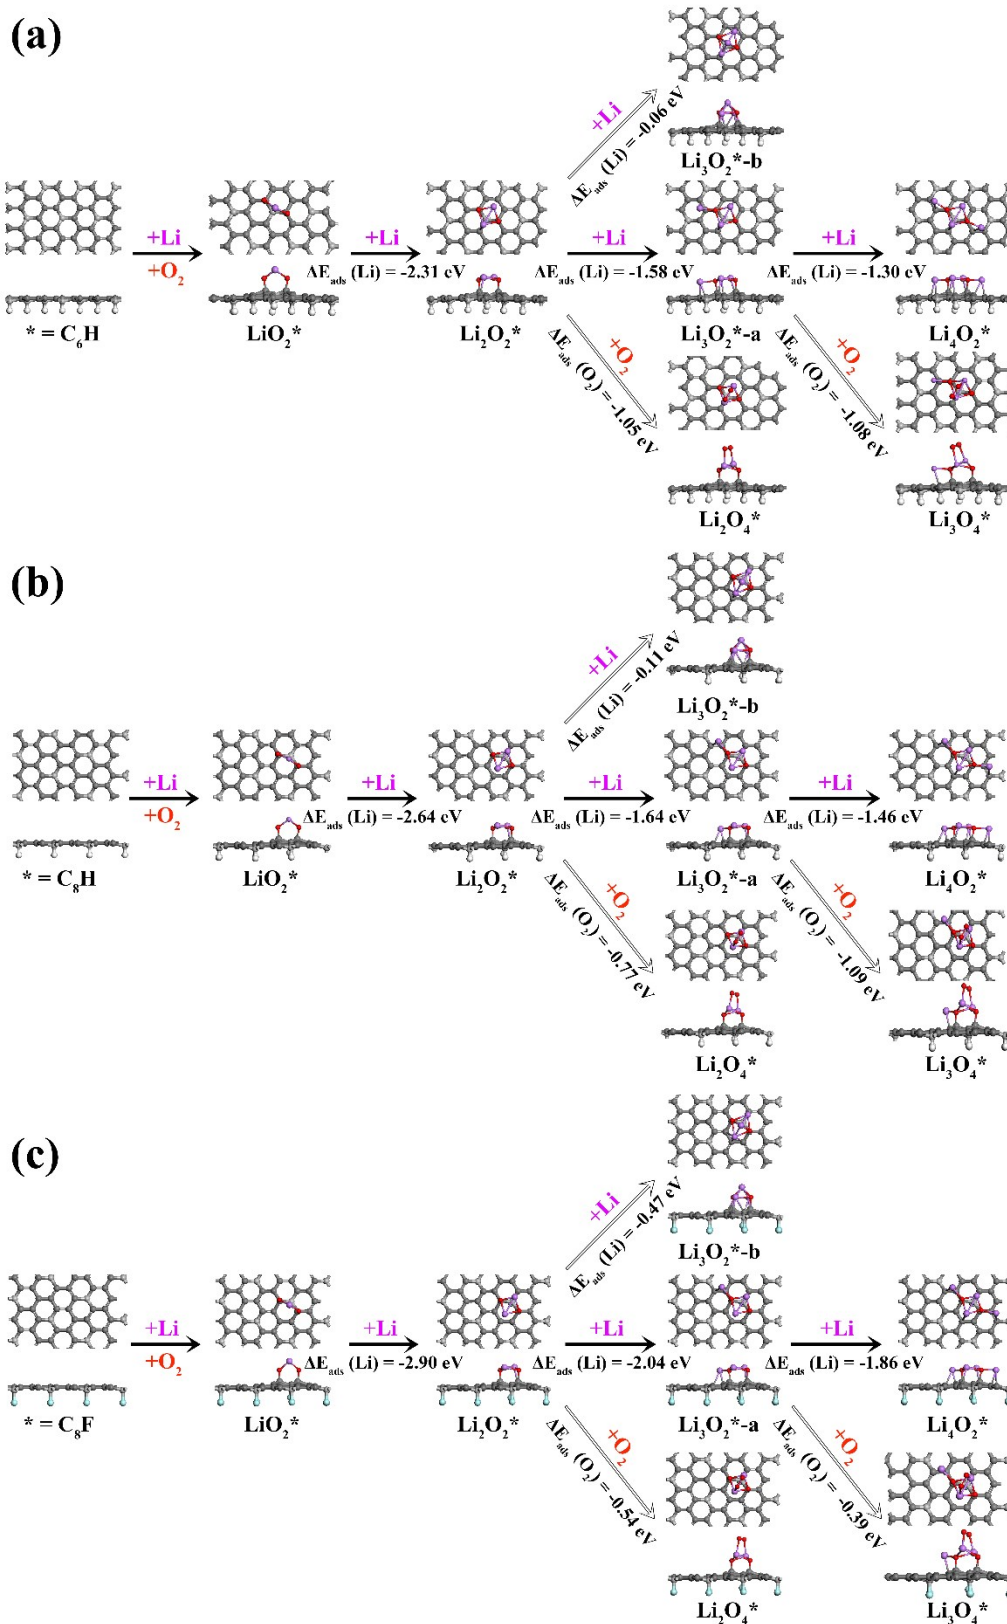

**Fig. S4** Schematics of the growing pathways of  $\text{Li}_4\text{O}_2$  on (a)  $\text{C}_6\text{H}$ , (b)  $\text{C}_8\text{H}$  and (c)  $\text{C}_8\text{F}$ . The grey, white, light blue, red and purple spheres represent C, H, F, O and Li atoms, respectively.

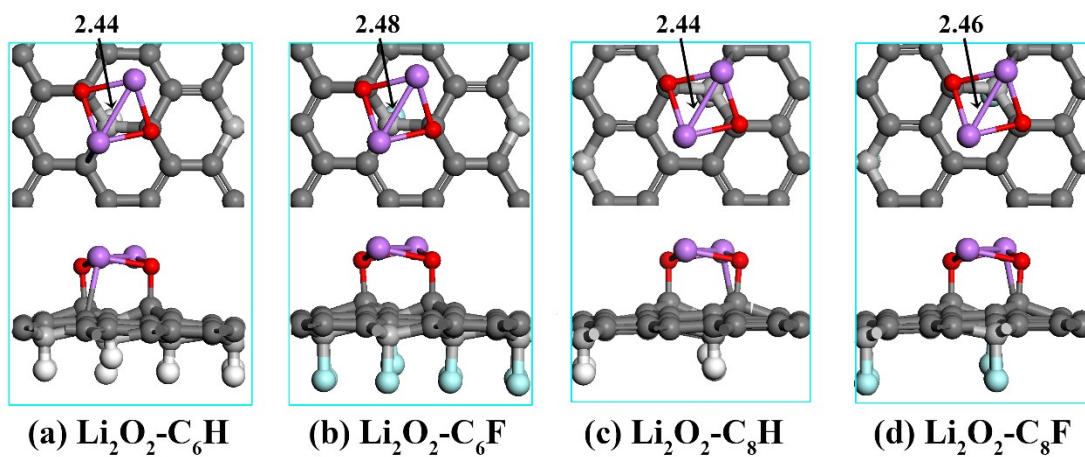

**Fig. S5** The detailed structural analysis on  $\text{Li}_2\text{O}_2$  adsorbed (a)  $\text{C}_6\text{H}$ , (b)  $\text{C}_6\text{F}$ , (c)  $\text{C}_8\text{H}$  and (d)  $\text{C}_8\text{F}$ . The distance between the two Li atoms (in Å) are denoted.

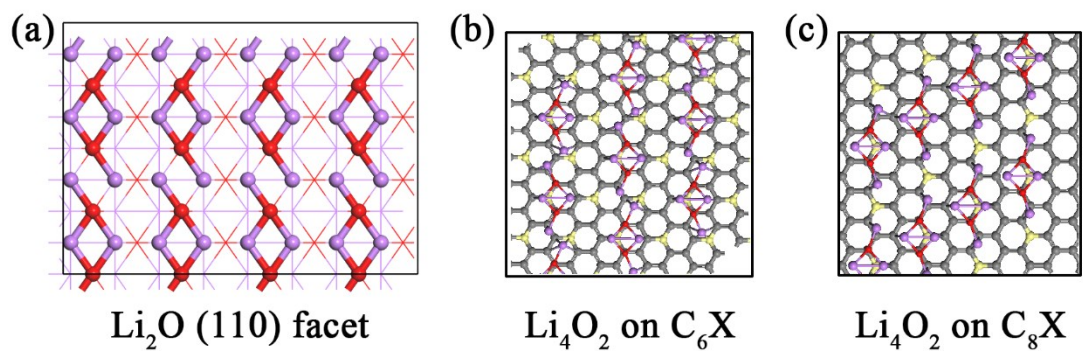

**Fig. S6** (a) The (110) facet cutting from bulk  $\text{Li}_2\text{O}$ , the  $\text{Li}_4\text{O}_2$  units in the surface are displayed as ball and stick model for clarity. (b) The simulated  $\text{C}_6\text{X}$  that is fully covered by  $\text{Li}_4\text{O}_2$  units. (c) The simulated  $\text{C}_8\text{X}$  that is fully covered by  $\text{Li}_4\text{O}_2$  units.

**Table S1.** The adsorption configurations and corresponding  $E_{\text{ads}}$  (eV), and charge transferred ( $Q_{\text{T}}$ , |e|) of  $\text{O}_2$  on different SSX-Grs.

|                      | Adsorption configuration                                                            | $E_{\text{ads}}$ | $Q_{\text{T}}$ |
|----------------------|-------------------------------------------------------------------------------------|------------------|----------------|
| $\text{C}_2\text{F}$ | 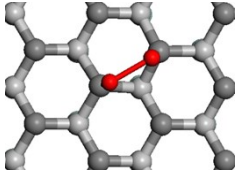   | -3.47            | -0.55          |
| $\text{C}_6\text{F}$ |    | -1.02            | -0.45          |
| $\text{C}_8\text{F}$ |    | -0.69            | -0.46          |
|                      |   | 0.43             | -0.47          |
| $\text{C}_2\text{H}$ |  | -3.52            | -0.52          |
| $\text{C}_6\text{H}$ |  | -1.39            | -0.47          |
| $\text{C}_8\text{H}$ |  | -1.21            | -0.48          |
|                      |  | -0.34            | -0.51          |
|                      |  | -0.15            | -0.49          |



**Table S2.** The adsorption energy ( $E_{\text{ads}}$ ) of the  $\text{LiO}_2$  and  $\text{O}_2\text{Li}$  on different SSX-Gr.

| Substrate            | Adsorbate             | $E_{\text{ads}}$ (eV) |
|----------------------|-----------------------|-----------------------|
| $\text{C}_6\text{F}$ | $\text{LiO}_2$        | -3.48                 |
|                      | $\text{O}_2\text{Li}$ | -1.78                 |
| $\text{C}_8\text{F}$ | $\text{LiO}_2$        | -3.09                 |
|                      | $\text{O}_2\text{Li}$ | -1.66                 |
| $\text{C}_6\text{H}$ | $\text{LiO}_2$        | -4.63                 |
|                      | $\text{O}_2\text{Li}$ | -2.00                 |
| $\text{C}_8\text{H}$ | $\text{LiO}_2$        | -3.98                 |
|                      | $\text{O}_2\text{Li}$ | -1.88                 |

### Reference

1. A. Togo, F. Oba and I. Tanaka, *Phys. Rev. B*, 2008, **78**, 134106.
